# Supplementary material for: Identification and Functional Analysis of lncRNAs Responsive to Hypoxia in Eospalax fontanierii
Source: Curr Issues Mol Biol. 2021 Nov 5;43(3):1889–905. doi: 10.3390/cimb43030132 (PMC8929107; doi:10.3390/cimb43030132)
Supplement: Supplementary file 1 [file cimb-43-00132-s001.zip]

Archive with 5 entries (5 files):
- FigureS1_qprc.pdf
- FigureS2_densityHist.pdf
- FigureS3_.pdf
- FigureS4_V2.pdf
- FigureS5_HIF_network.pdf
