# Supplementary figures and images for: Identification and Functional Analysis of lncRNAs Responsive to Hypoxia in Eospalax fontanierii
Source: MDPI journal article supplement (doi:10.3390/cimb43030132), 2021-11-05

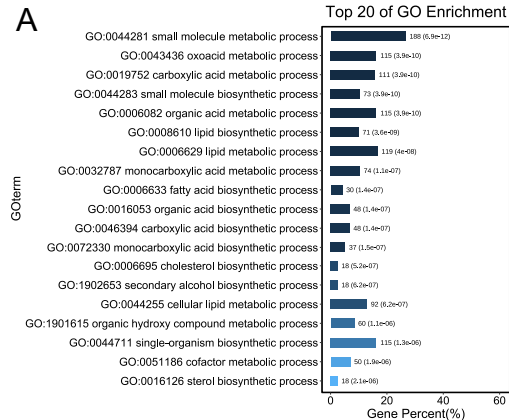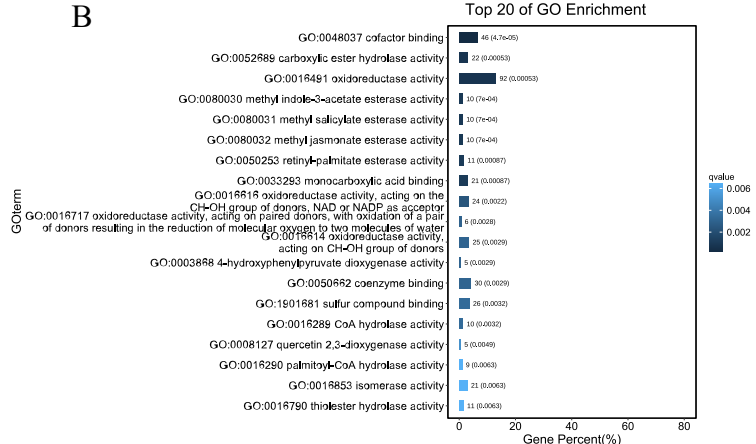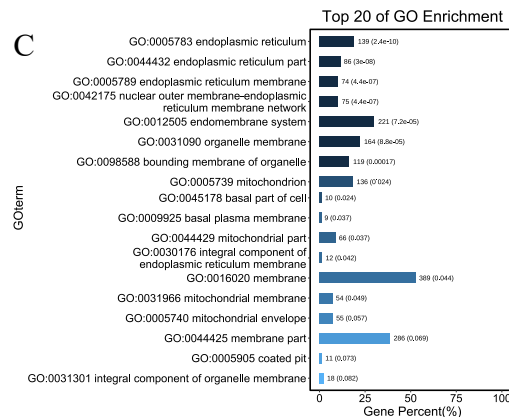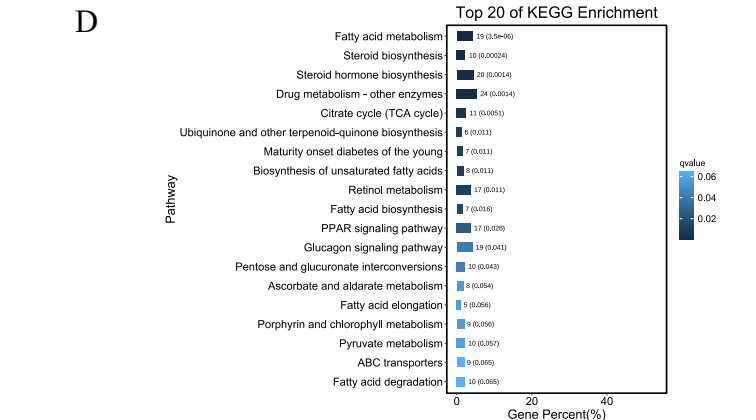

Supplement: s1 [file s1]

# Top 20 of KEGG Enrichment

Pathway

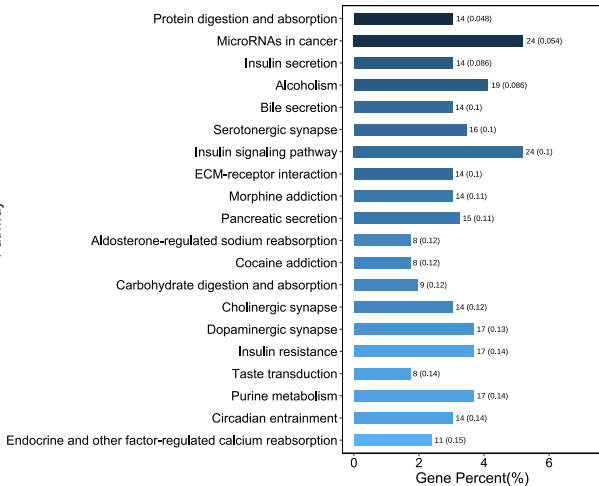

Supplement: s1 [file s1]

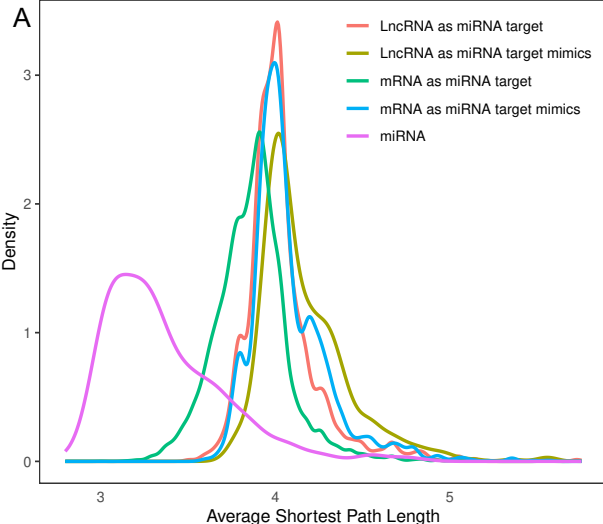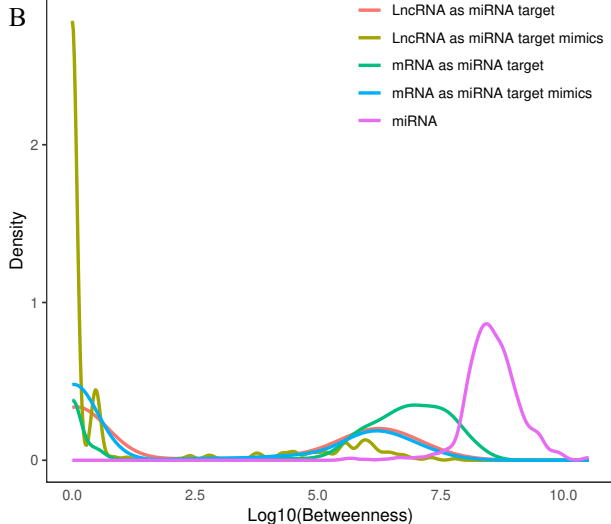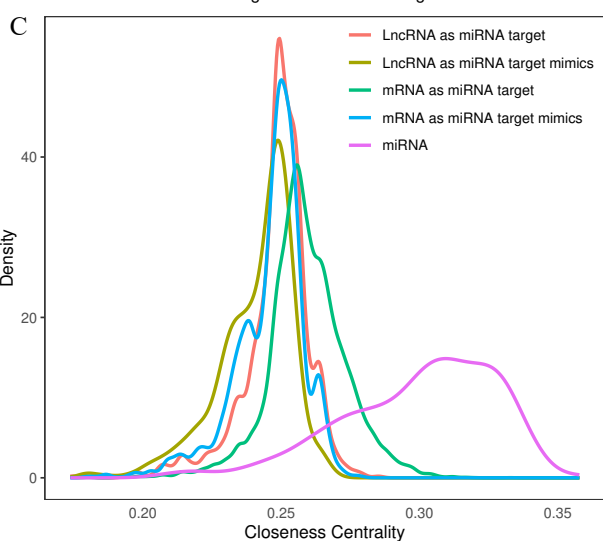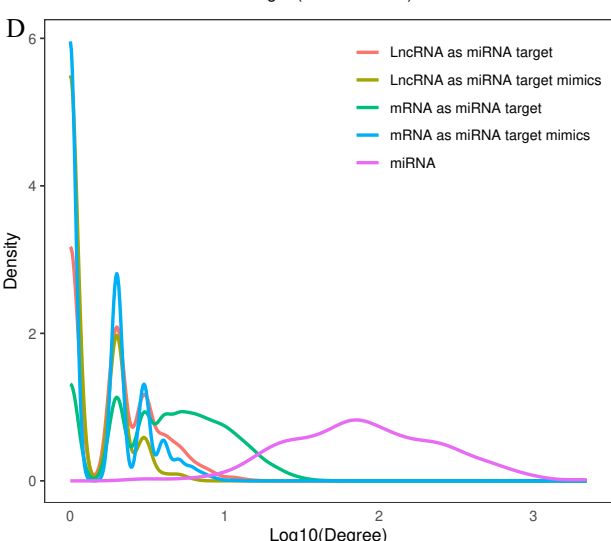

Supplement: s1 [file s1]

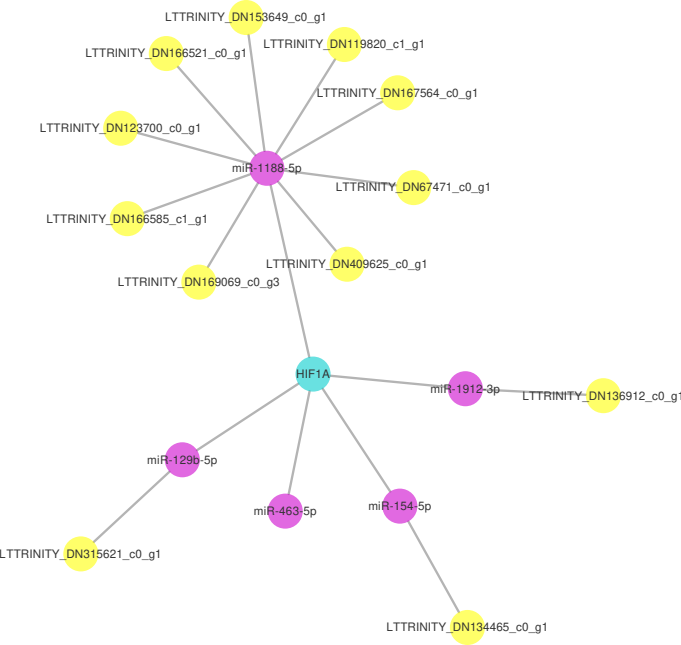

Supplement: s1 [file s1]

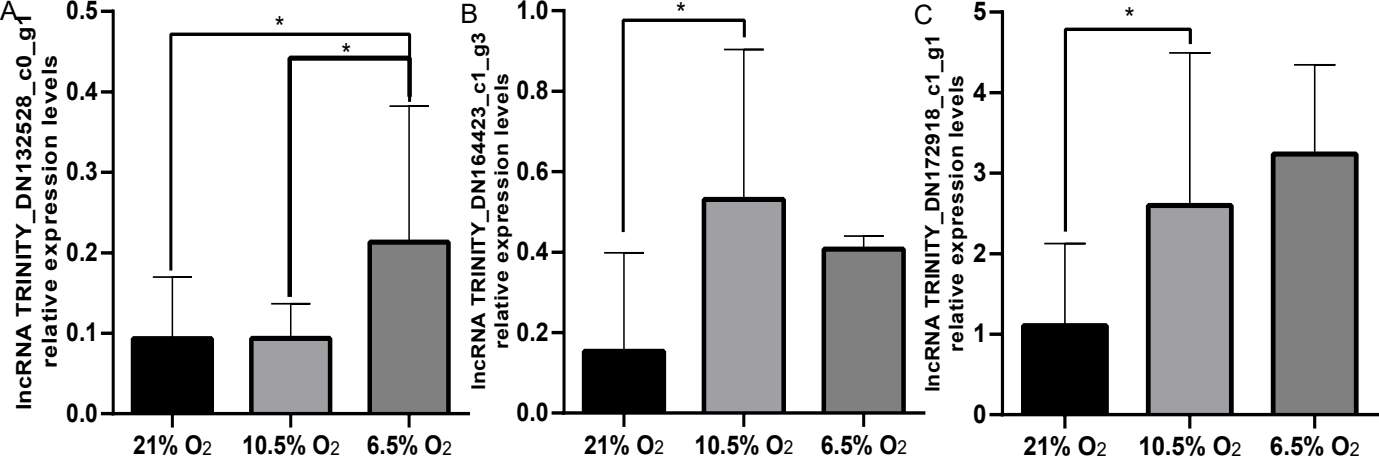

Supplement: s1 [file s1]
